# 1 **Pollen Explains Flu-Like and COVID-19 Seasonality**

2

3 Martijn J. Hoogeveen<sup>1</sup>, Eric C.M. van Gorp<sup>2</sup>, and Ellen K. Hoogeveen<sup>3</sup>.

4

5 1. Department Technical Sciences & Environment, Open University, The Netherlands.

6 2. Department of Viroscience and department of Infectious Diseases, Erasmus Medical Centre,

7 Rotterdam, The Netherlands.

8 3. Department of Internal Medicine, Jeroen Bosch Hospital, Den Bosch, The Netherlands.

9

10 Corresponding author:

11 Martijn J. Hoogeveen

12 De Liesbosch 12d, 3439LC Nieuwegein, The Netherlands

13 [martijn.hoogeveen@icecat.com](mailto:martijn.hoogeveen@icecat.com)

14

## 15 **Abstract**

16 *Current models for flu-like epidemics insufficiently explain multi-cycle seasonality. Meteorological*  
17 *factors alone do not predict seasonality, given substantial climate differences between countries that*  
18 *are subject to flu-like epidemics or COVID-19. Pollen is documented to be antiviral and allergenic,*  
19 *play a role in immuno-activation, and seems to create a bio-aerosol lowering the reproduction*  
20 *number of flu-like viruses. Therefore, we hypothesize that pollen may explain the seasonality of flu-like*  
21 *epidemics including COVID-19.*

22 *We tested the Pollen-Flu Seasonality Theory for 2016-2020 flu-like seasons, including COVID-19, in*  
23 *The Netherlands with its 17 million inhabitants. We combined changes in flu-like incidence per*

24 ~~NOTE: This preprint reports new research that has not been certified by peer review and should not be used to guide clinical practice.~~

25 *period. Finally, a discrete, predictive model is tested using pollen and meteorological threshold values*  
26 *displaying inhibitory effects on flu-like incidence.*

27 *We found a highly significant inverse association of  $r(224) = -.38$  between pollen and changes in flu-*  
28 *like incidence corrected for incubation period, confirming our expectations for the 2019/2020*  
29 *COVID-19 season. We found that our predictive model has the highest inverse correlation with*  
30 *changes in flu-like incidence of  $r(222) = -.48$  ( $p < .001$ ) when pollen thresholds of 610 total pollen*  
31 *grains/m<sup>3</sup> per week, 120 allergenic pollen grains/m<sup>3</sup> per week, and a solar radiation threshold of 510*  
32 *J/cm<sup>2</sup> are passed. The passing of at least the pollen thresholds, precludes the beginning and end of flu-*  
33 *like seasons. Solar radiation is a supportive factor, temperature makes no difference, and relative*  
34 *humidity associates even with flu-like incidence increases.*

35 *We conclude that pollen is a predictor for the inverse seasonality of flu-like epidemics including*  
36 *COVID-19, and solar radiation is a co-inhibitor. The observed seasonality of COVID-19 during*  
37 *Spring, suggests that COVID-19 may revive in The Netherlands after week 33, the start being*  
38 *preceded by the relative absence of pollen, and follows standard pollen-flu seasonality patterns.*

## 39 **Introduction**

40 Current models for flu-like epidemics insufficiently explain multi-cycle seasonality. Meteorological  
41 factors alone do not predict the seasonality of flu-like epidemics (Tamerius et al., 2011) or COVID-19  
42 (Yao et al, 2020). Pollen is documented to be antiviral (Ghanem et al., 2015; Palmer-Young et  
43 al.,2017; Wachsman et al, 2000), anti-influenza (Chen, 2016), allergenic (Klemens et al, 2007;  
44 Rosenwasser, 2011; Howarth, 2000), and plays a role in immuno-activation (Brandelius et al, 2020).  
45 Recently, we identified pollen bio-aerosol as a discrete seasonal factor in inhibiting flu-like epidemics  
46 for the period 2016 to 2019 in The Netherlands (Hoogeveen, 2020). In this epidemiological study, we  
47 found strong inverse associations between allergenic pollen counts and hay fever on the one hand, and  
48 flu-like incidence on the other hand. The study was based on the persistent observation that pollen and  
49 flu season predictably alternate each other in moderate climate zones, and the absence of sufficient  
50 meteorological explanations (Tamerius et al., 2011). We further observed that the passing of pollen

51 impact threshold values of around 100 allergenic pollen grains/m<sup>3</sup> per week, reliably mark the onset  
52 and decline of moderate flu-like epidemic lifecycles, and thus can be used as predictor.

53 The seasonality of respirational viral diseases has already been recognized for thousands of years in  
54 temperate regions (Moriyama et al., 2020). More in detail, virologists observed that the cold, and flu-  
55 like epidemics (e.g., influenza and corona caused) “go away in May” in the Northern Hemisphere,  
56 while emerging in the Southern Hemisphere with its opposite seasonality, to re-emerge in the Northern  
57 Hemisphere during its next Autumn and Winter in a slightly mutated form. Furthermore, all new flu-  
58 like pandemics since 1889 typically emerged in the Northern Hemisphere at the tail-end of respective  
59 flu-seasons (Fox et al., 2017), whereby the current COVID-19 pandemic is clearly no exception. Fox  
60 et al. showed that most flu-like pandemics are multi-wave, whereby the initial wave at the tail-end of  
61 flu season is typically short-lived. This gives rise to the suspicion that COVID-19 is subject to such  
62 multi-wave seasonality as well (Kissler et al., 2020).

63 Numerous studies try to explain flu-like seasonality from meteorological factors such as UV radiation  
64 (Schuit et al., 2020), temperature and humidity (Chong et al., 2020; Shaman et al, 2011). However,  
65 Postnikov (2016) concluded that ambient temperature is not a good predictor for influenza seasonality  
66 in The Netherlands, and the association of humidity to influenza is inconsistent (Soebiyanto et al.,  
67 2014). Although UV light is detrimental for flu-like viruses under laboratory conditions, and  
68 associated with immuno-activation (Abhimanyu & Coussens, 2017; Tan & Ruegiger, 2020) and  
69 circadian rhythms regulating lung immunity (Nosal et al., 2020), the early onset of flu season, halfway  
70 August in The Netherlands, coincides with an annual peak in hot, sunny days. Also for the decrease of  
71 COVID-19 infections, nor high UV nor high temperature are good predictors (Yao et al, 2020).  
72 Nevertheless, these meteorological variables are known factors in the ripening and dispersion of  
73 pollen.

74 We hypothesize that there is an inverse direct or indirect effect of pollen bio-aerosol on flu-like  
75 incidence and COVID-19 (Hoogeveen, 2020) (See Fig. 1).

76 To further understand the impact of pollen as an environmental factor influencing the life cycle of flu-  
 77 like epidemics, the objective of this study is to falsify the hypothesis that there are no inverse  
 78 associations between allergenic and non-allergenic pollen counts, and flu-like epidemic life cycles and  
 79 incidence in The Netherlands, including COVID-19, and develop a simple, discrete model helping to  
 80 predict pollen-flu seasonality switches.

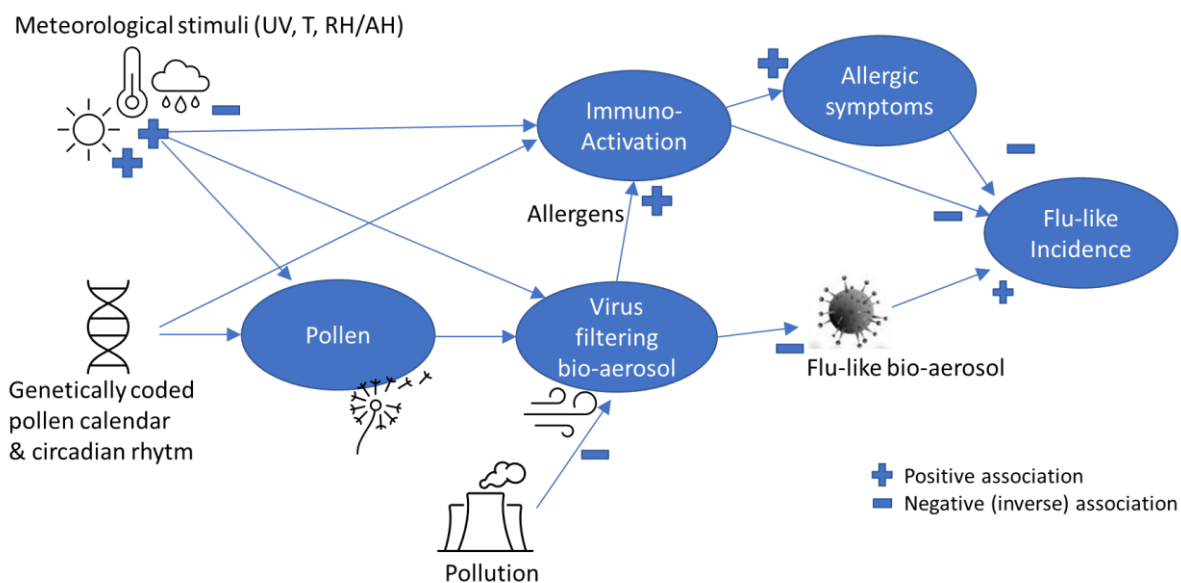

81  
 82 *Figure 1: a simplified theoretic model explaining pollen-flu inverse seasonality, whereby pollen might*  
 83 *have a direct (I) “anti-viral”, indirect allergenic (II) and/or immune triggering (III) function,*  
 84 *inhibiting flu-like epidemic incidence in combination with meteorological conditions and triggers.*

## 86 Method

87 To study the relation between pollen and flu-like incidence in The Netherlands, we used the public  
 88 data sets of Elkerliek Hospital (Elkerliek.nl) about the weekly allergenic, non-allergenic and total  
 89 pollen counts in The Netherlands in grains/m<sup>3</sup>. Total pollen count is the combination of allergenic and  
 90 non-allergenic pollen counts. Further, we use the data from the Dutch State Institute for Public Health  
 91 (RIVM.nl) gathered by Nivel (Nivel.nl) about weekly flu-like incidence (WHO code “ILI”) reports at  
 92 the primary medical care, per 100,000 citizens in The Netherlands with a population of currently 17.4  
 93 million. ILI (influenza like illnesses) is defined as a combination of a measured fever of  $\geq 38$  °C, and

94 cough, with an onset within the last 10 days. The flu-like incidence metric is based on a representative  
95 group of 40 primary care units, and calculated using the number of influenza-like reports per primary  
96 care unit divided by the number of patients registered at that unit, averaged for all primary care units,  
97 and next extrapolated to the complete population. Compared to our previous study (Hoogeveen, 2020),  
98 we have expanded the datasets with 42 weeks so that it now runs from week 1 of 2016 till week 18 of  
99 2020 ( $n = 226$  data points) to include the recent COVID-19 pandemic in the tail-end of flu season.

100 Further, we have added the non-allergenic pollen counts to the allergenic ones as it does not matter for  
101 the bio-aerosol filter function whether pollen is allergenic or not.

102 Further, we added the meteorological datasets from the Royal Dutch Meteorological Institute  
103 (KNMI.nl), including relative humidity/day, average temperature/day and global solar radiation in  
104  $J/cm^2$  per day as an indicator of UV radiation, from its centrally located De Bilt weather station, and  
105 calculated the weekly averages for the same period.

106 To test allergenic versus non-allergenic pollen assumptions, against hay fever and pre-covid-19 flu-  
107 like incidence, we make use of the hay fever index. The hay fever index is defined as turnover for hay  
108 fever medication as reported by all Dutch pharmacies to the Dutch Central Bureau of Statistics  
109 (CBS.nl) based on respective ATC codes (R01A/R01AC). We use a dataset from week 1 of 2016 till  
110 week 10 of 2019 ( $n=166$  data points), as no further data has been made available.

111 There is no missing data in the data sets, except that there are only three weekly pollen counts missing  
112 because of a malfunctioning metering station. We used a 4 weeks surrounding average to estimate the  
113 three missing data points to avoid breaking lines in visuals. However, given the large number of 226  
114 data points, and by using this trend-based average, we assume that these missing data have no material  
115 impact on the results.

116 Regarding the incidence of flu-like symptoms, we calculated the weekly change compared to the  
117 previous period to get an indication of the flu-like epidemic life cycle progression, whereby a decline  
118 is interpreted as  $R_o < 1$  and an increase as  $R_o > 1$  ( $R_o$  is the reproduction number of flu-like viruses).

119 Further, to cover, in one time-series metric, for changes in flu-like incidence as well as an incubation

120 period of up to two weeks, we calculated a three weeks moving average (3WMA) of changes in flu-  
121 like incidence, of which two weeks are forward looking.

122 We tested the following statistical null hypotheses:

123 H1<sub>0</sub>: there are no inverse correlations for non-allergenic and total pollen counts with flu-like incidence  
124 (corrected for incubation period).

125 H2<sub>0</sub>: there are no inverse correlations between pollen and changes in flu-like incidence (corrected for  
126 incubation time 3WMA).

127 *Checking assumptions:*

128 H3<sub>0</sub>: non-allergenic pollen has no effect on hay fever.

129 H4<sub>0</sub>: meteorological variables – solar radiation, temperature and relative humidity – have no effect on  
130 pollen and flu-like incidence change (3WMA).

131 H5<sub>0</sub>: there is no predictive significance of a discrete model's compound value, based on pollen and  
132 solar radiation thresholds, on changes in flu-like incidence (3WMA).

133 Note that except H3, all hypotheses are related to potential causality: the temporal sequentiality of the  
134 respective independent variables, and flu-like consults corrected for incubation period.

135

136 *Statistical analyses*

137 Variables are presented with their mean and standard deviation (SD).

138 We calculated correlation coefficients to do a first test of hypotheses, as data sets show normal  
139 distributions, to assess the strength and direction of relationships. Next, linear regression (F-test) on  
140 identified inhibitors and interactions is used to determine the linear equation using estimates and  
141 intercept values, and produce the test values such as probability, significance level, F-value, and the  
142 Multiple R squared correlation to understand the predictive power of the respective inhibitor. Standard  
143 deviations and errors, and degrees of freedom (DF) are used as input for calculating the 95%

144 probability interval. We report the outcome of statistical tests in APA style. Simple calculations as  
145 averages and SDs per dataset are calculated in Excel (STDEV.S function).

146

147 Second, we created a simple, discrete model using selected flu-like inhibitors, to determine the optimal  
148 threshold values for these inhibitors which have the highest joint correlation with changes in flu-like  
149 incidence (3WMA), and test the final discrete model in a linear regression test (F-test) to understand  
150 its predictive power and determine the linear equation when significant.

151 It is outside of the scope of this research to verify the underlying data sets of Elkerliek Ziekenhuis,  
152 RIVM/Nivel, CBS, and KNMI by examining the validity and reliability of data collection methods.

153 All regression analyses are done using the statistical package R version 3.5.

154

## 155 Results

156 The mean value and standard deviation for all pollen are 732 grains/m<sup>3</sup> per week (SD: 1368), for  
157 allergenic pollen 349 grains/m<sup>3</sup> per week (SD: 987), for non-allergenic pollen 383 grains/m<sup>3</sup> per week  
158 (SD: 626) and for flu-like incidence 47 consults/100K citizens per week (SD: 40.2).

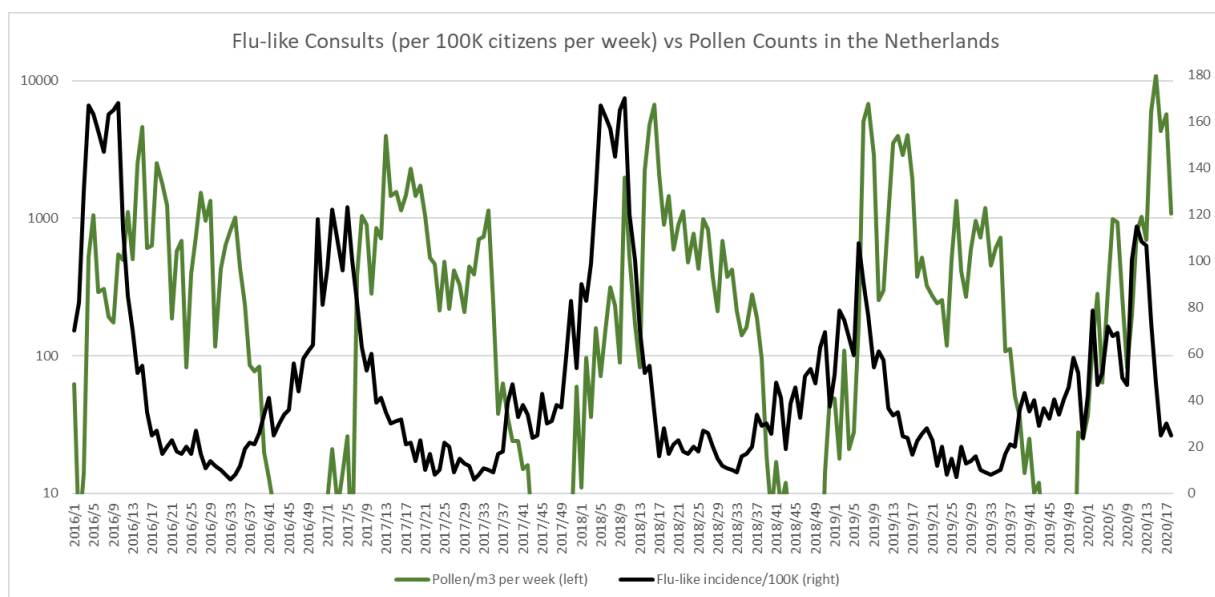

159

160 *Figure 2: Total pollen counts vs flu-like incidence in The Netherlands on a logarithmic scale, whereby*  
161 *passing the 610 total pollen grains/m<sup>3</sup> per week threshold marks the seasonal switch.*

162

163 When further inspecting the data sets regarding pollen counts and flu-like consults at primary medical  
164 care in The Netherlands, it is clear that there are continuous pollen bursts (Figure 2), whereby only a  
165 few of these pollen bursts are classified as allergenic (Figure 4). These bursts of pollen, allergenic or  
166 non-allergenic, typically coincide with and precede a decline of flu-like consults.

167 In our previous study, we found a significant inverse association between allergenic pollen counts and  
168 changes in flu-like incidence, but no significant inverse correlations between allergenic pollen counts  
169 and flu-like incidence due to the short and extreme bursts of these allergenic pollen (Hoogveen,  
170 2020). However, the addition of non-allergenic pollen reveals highly significant negative correlations  
171 ( $r(224) = -.19, p < .01$ ) with flu-like incidence, which become stronger when correcting for two weeks  
172 incubation time ( $r(222) = -.31, p < .00001$ ). We can thus reject the null-hypotheses ( $H_{10}$ ) that non-  
173 allergenic pollen, has no negative association with flu-like incidence, including the first cycle of the  
174 COVID-19 pandemic, and thus we cannot rule out the non-allergenic pathway. That the associations  
175 become stronger when taking into account incubation time, implies temporality, also in the case of  
176 total pollen count (see Table 1). Furthermore, we can also observe from Figure 2 that flu-like consults  
177 start to decline *after* the first pollen bursts. And that flu-like consults start to increase sharply *after*  
178 pollen counts become very low or close to zero. This adds to the sense of causality as well. Further, we  
179 can notice that the first COVID-19 cycle behaves according to pollen-flu seasonality.

180 These findings indicate that it makes sense to include the so-called non-allergenic pollen in our model  
181 and pollen tests as well.

182

|                           | Total pollen |      | Non-allergenic pollen |    |
|---------------------------|--------------|------|-----------------------|----|
| <b>Flu-like incidence</b> | -.05         | n.s. | -.19                  | ** |



+2week incubation                      -.19    \*\*                      -.31    \*\*\*

183                      *Table 1. Correlations between flu-like incidence and total pollen and non-allergenic pollen.*

184                      (*n.s.: not significant, \*  $p < .05$ , \*\*  $p < .01$ , \*\*\*  $p < .001$ )*)

185                      When testing the impact on the *changes* in medical flu-like consults (mean: -0.25, SD: 15.4), the  
186                      extended dataset till 2020, including COVID-19, shows a stronger and highly significant inverse  
187                      correlation with allergenic pollen ( $r(223) = -.23$ ,  $p = .000413$ ) compared to our previous study. For  
188                      total pollen, including non-allergenic pollen, the association is even somewhat stronger ( $r(223) = -.27$ ,  
189                       $p = .000059$ ). Therefore, we can falsify the null-hypothesis ( $H_{20}$ ) that there are no inverse correlations  
190                      between the weekly pollen counts – total or only allergenic - and changes in flu-like incidence,  
191                      including the period covering the first cycle of the COVID-19 pandemic. These inverse correlations  
192                      provide thus further support for the alternative hypothesis that the presence of an elevated level of  
193                      pollen has an inhibiting effect on flu-like incidence, and starts to immediately influence the direction  
194                      and course of the epidemic life cycle. COVID-19 behaves according to the expected pollen-flu  
195                      seasonality, like all other flu-like pandemics have since the end of the 19<sup>th</sup> century.

196                      Using the three weeks moving average (3WMA) of changes in flu-like consults (mean: -0.26, SD:  
197                      8.9), the correlation coefficients become stronger and are again all highly significant  
198                      for both allergenic pollen ( $r(224) = -.34$ ,  $p < .00001$ ) and total pollen count ( $r(224) = -.38$ ,  $p < .00001$ ).

199                      We can thus also reject the null-hypothesis ( $H_{20}$ ) that there is no inverse relation between pollen and  
200                      changes in flu-like consults (3WMA). As this correlation is stronger than if not corrected for  
201                      incubation period, it is a further indication of temporality, and as they are stronger now with the  
202                      2019/2020 flu-like season included, it further supports the idea that COVID-19 is subject to pollen  
203                      induced flu-seasonality as well.

204                      Linear regression analysis shows that there is a highly significant inhibitory effect of pollen on flu-like  
205                      incidence change (3WMA) of  $F(1, 222) = 37.1$ ,  $p < .001$  (see Table 2 line 1), as a further basis for  
206                      using total pollen count as a predictor.

| $\Delta$ Flu-change 3WMA p.w.                            | Estimate | 95%CI            | Intercept | Multiple R sq. | F-stat on DF   | P<   |
|----------------------------------------------------------|----------|------------------|-----------|----------------|----------------|------|
| <b>1. Total pollen count per 100/m<sup>3</sup> incr.</b> | -0.253   | -0.334 to -0.171 | 1.53      | 0.14           | 37.1 (1, 222)  | .001 |
| <b>2. Solar radiation per 100 J/cm<sup>2</sup> incr.</b> | -0.312   | -0.475 to -0.153 | 2.98      | 0.06           | 14.43 (1, 222) | .001 |
| <b>3. Compound predictor per incr. of 1</b>              | -3.88    | -4.82 to -2.94   | 4.95      | 0.23           | 65.59 (1, 222) | .001 |

207

208 *Table 2: Summary of univariable regression analyses of pollen (1), solar radiation (2) and our*  
 209 *compound pollen/solar radiation predictor (3) on changes in flu-like incidence (3WMA) showing all*  
 210 *highly significant ( $p < .001$ ) results, but the correlation for solar radiation is weak (.06) and the*  
 211 *compound predictor the strongest (.23).*

212

| $\Delta$ Flu-like incidence per 100K p.w. | Estimate | 95%CI             | Intercept | Multiple R sq. | F-stat on DF   | P<   |
|-------------------------------------------|----------|-------------------|-----------|----------------|----------------|------|
| <b>Hay fever index per 1% incr.</b>       | -0.12677 | -0.181 to -0.0723 | 63.81     | 0.11           | 20.74 (1, 164) | .001 |

| $\Delta$ Hay Fever Index (2016=100)                   | Estimate | 95%CI          | Intercept | Multiple R sq. | F-stat on DF   | P<   |
|-------------------------------------------------------|----------|----------------|-----------|----------------|----------------|------|
| <b>Total pollen count per 100/m<sup>3</sup> incr.</b> | 5.3049   | 3.922 to 6.688 | 67.78     | 0.26           | 56.52 (1, 164) | .001 |

213

214 *Table 3: Summary of univariable regression analyses of total pollen count on hay fever ( $p < .001$ ) and*  
 215 *hay fever on flu-like incidence/100K citizens per week ( $p < .001$ ), whereby pollen leads to an increase*  
 216 *in hay fever, which in turn is associated with a decrease in flu-like incidence.*

217 Previously, we established a highly significant inverse correlation of  $r(164) = -.34$  ( $p = .00001$ )  
 218 between the hay fever index (mean: 101 SD: 115.7) and flu-like medical incidence (Hoogeveen,  
 219 2020). Univariable regression analyses show that there is a highly significant positive effect of all  
 220 pollen on hay fever incidence, which in turn has a highly significant inhibitory effect on flu-like  
 221 incidence (see Table 3). In line with the association between pollen and flu-like incidence, the inverse  
 222 association between *total* pollen count and hay fever is stronger ( $r(164) = -.51$ ,  $p < .00001$ ) than those  
 223 for allergenic and non-allergenic pollen individually. This confirms that we can best use total pollen  
 224 count as predictor. Counter to expectation, non-allergenic pollen has a highly significant effect on hay  
 225 fever as well ( $r(164) = .48$ ,  $p < .00001$ ). We can thus reject the null-hypothesis that non-allergenic  
 226 pollen ( $H_{30}$ ) has no effect on hay fever. This might imply that pollen classified as non-allergenic might

227 still be responsible for certain allergic effects, and not just allergenic pollen. Therefore, trying to use  
228 non-allergenic pollen to discriminate effects outside the allergenic path regarding the immune system  
229 might be challenging.

230

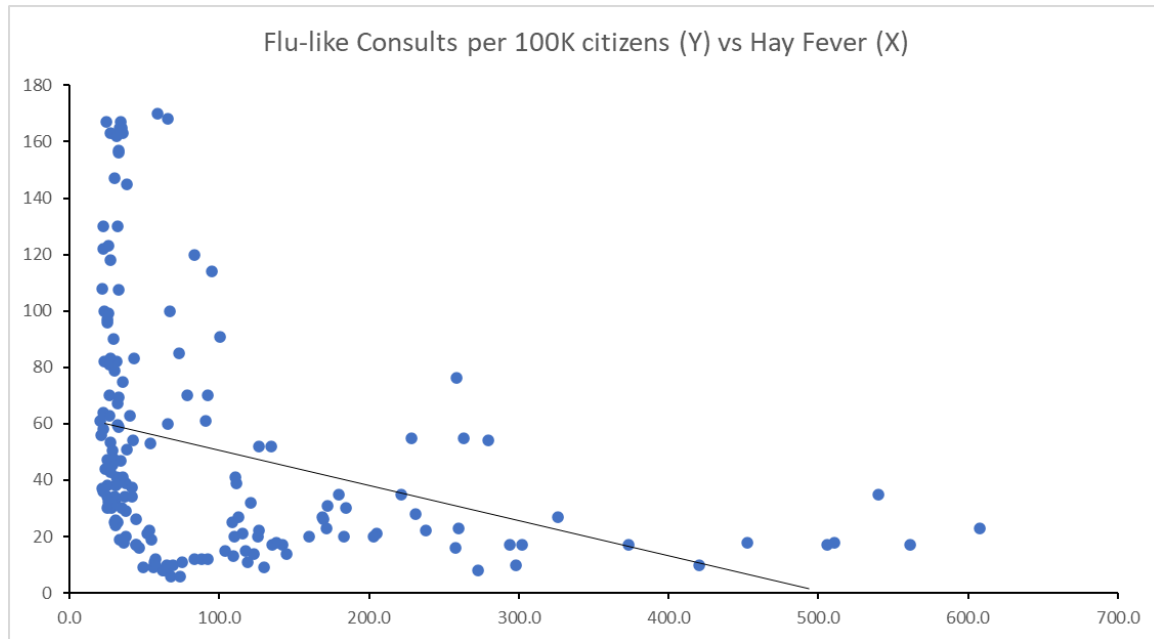

231

232 *Figure 3: hay fever is inversely associated with flu-like incidence ( $r(164) = -.34, p < .01$ ) and the*  
233 *regression equation is:  $Y = -0.1268 * X + 63.82$ .*

234 Given the scatter diagram in Figure 3, the nature of the relation between hay fever and flu-like  
235 consults, might however not be strictly linear, but logarithmic. Such a logarithmic relation might  
236 support the idea that switching thresholds are important to understand the relation between the  
237 independent variables and flu-like incidence.

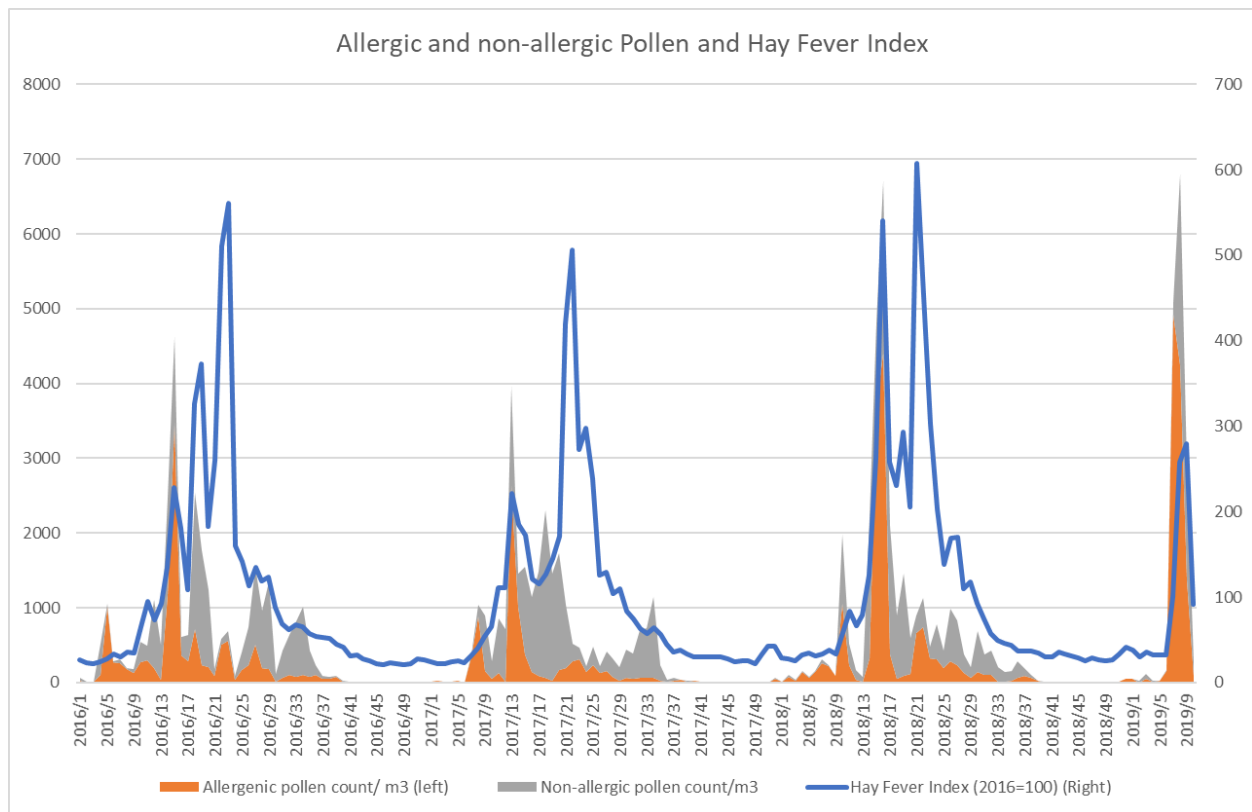

238

239

*Figure 4: Both allergenic and non-allergic pollen are associated with hay fever.*

240

241

The expected effects of relative humidity ( $r(224) = -.46, p < .001$ ), temperature ( $r(224) = .10$  n.s.) and

242

solar radiation ( $r(224) = .35, p < .001$ ) on pollen are found. So, there is more pollen with sunny,

243

warmer and dry weather. We can reject the null-hypothesis that meteorological variables ( $H_0$ ) have

244

no effect on pollen, for solar radiation (mean: 1047, SD: 709) and relative humidity (mean: 79, SD:

245

8.3), but not for temperature (mean: 10.8, SD: 5.8), whereby relative humidity is reducing the amount

246

of aerosol pollen. The relation with temperature might only be significant during the start of pollen

247

season as it is known to shift the pollen calendar.

248

Counter to findings in other studies, relative humidity is positively associated to changes in flu-like

249

incidence (3WMA) in The Netherlands ( $r(224) = .34, p < .00001$ ). Dutch flu season is cold and humid,

250

and on rainy days the effect of pollen is reduced. Although temperature strongly correlates with flu-

251

like incidence ( $r(226) = -.71, p < .001$ ), it has a neglectable effect on changes in flu-like incidence

252

( $r(224) = -.02$  n.s.) and it doesn't change with incubation time. Therefore, temperature has likely no

253 direct effect on aerosol flu-like viruses and the life cycle of a flu-like epidemic. In line with this,  
254 temperature is also not a good marker for the onset or the end of flu season as the end of flu season  
255 ( $R_o < 1$ ) can coincide with an average temperature of close to 0 °C and the start of flu season ( $R_o > 1$ )  
256 can coincide with temperatures as high as 17 °C in The Netherlands.

257 Only for solar radiation there is a highly significant inverse association with changes in flu-like  
258 incidence (3WMA) ( $r(224) = -.25$ ,  $p = .000156$ ), so it is not unlikely that apart from its indirect effects,  
259 it is playing a role in destroying the aerosol flu-like viruses before they can infect someone.

260 Thus, from the meteorological variables, for solar radiation and relative humidity the null-hypothesis  
261 ( $H_{40}$ ) can also be rejected for that they have no effect on the flu-like epidemic lifecycle. But, of these  
262 two only solar radiation is a flu-like inhibitor in line with its positive effect on pollen count.

263 A simple regression test confirms that there is a highly significant inhibitory effect for solar radiation  
264 on flu-like incidence change (3WMA) ( $F(1, 222) = 14.43$ ,  $p < .001$  (see Table 2 line 2). As the  
265 correlation is weak (Multiple R-squared = .06), we can see solar radiation only as a supportive factor  
266 to pollen.

267 Taking into account all these findings, we developed a discrete, compound model in which we take the  
268 changes in flu-like incidence (3WMA), a threshold value for solar radiation ( $k_r$ ), and both pollen  
269 threshold values for allergenic ( $k_{ap}$ ) and all pollen ( $k_p$ ). We found that the compound model (mean:  
270 1.4, SD: 1.1) has the highest inverse correlation ( $r(222) = -.48$ ,  $p < .001$ ) for the following threshold  
271 values:  $k_r$ : 510 J/cm<sup>2</sup>,  $k_{ap}$ : 120 allergenic pollen grains/m<sup>3</sup> per week, and  $k_p$ : 610 total pollen grains/m<sup>3</sup>  
272 per week. In line with the previous outcomes, inclusion of relative humidity, non-allergenic pollen or  
273 temperature did not improve the correlation strength of this model. As they also did not show  
274 significant interaction effects with pollen, also such interactions are not meaningful to consider for the  
275 model.

276 In each of the observed years the now (re)defined pollen thresholds are being past in week 10 ( $\pm 5$   
277 weeks) depending on meteorological conditions controlling the pollen calendar, which coincides also

278 with reaching flu-like peaks, and again in week 33 ( $\pm 2$  weeks) marking the start of the new flu-like  
279 season.

280 There is a highly significant inhibitory effect of our compound thresholds based predictor value  
281 (outcomes are in the range [0, 3]) on flu-like incidence change (3WMA) of  $F(1, 222) = 65.59$ ,  $p < .001$   
282 and a Multiple R-squared correlation of 0.2281 (see Table 2 line 3). This confirms the usefulness of a  
283 discrete, pollen and solar radiation thresholds based model as a predictor of switches in flu-like  
284 seasonality, whereby the effect of pollen is stronger than that of solar radiation. As a consequence we  
285 can reject the null-hypothesis ( $H_{5_0}$ ) that this compound pollen/solar radiation value has no predictive  
286 significance for flu-like seasonality.

287

## 288 **Discussion**

289 We found highly significant inverse relations between pollen and (changes in) flu-like incidence: a  
290 higher number of pollen associates with a decline in flu-like incidence. This association becoming  
291 stronger when including the 2019/2020 period. Therefore, we conclude that also COVID-19 is subject  
292 to pollen-flu seasonality as all previous pandemics since the end of the 19<sup>th</sup> century.

293 When taking into account all pollen, both allergenic and non-allergenic, the inverse association  
294 between the increment of pollen and decline of flu-like incidence becomes stronger. This finding is in  
295 line with our virus filtering aerosol hypothesis in which aerosol pollen de-activate aerosol viruses  
296 before they can infect a new host. However, as so-called non-allergenic pollen also contributes to the  
297 incidence of hay fever in our study, another explanation might be that non-allergenic pollen have  
298 immuno-activating effects as well. Therefore, we included the total number of pollen as a predictor of  
299 flu-like seasonality, not just the number of allergenic pollen. The fact that the inhibitive effects of  
300 pollen gets stronger when taking into account an incubation period of up to two weeks strengthens the  
301 idea of causality.

302 The highly significant inverse association between hay fever and flu-like incidence can be interpreted  
303 in a number of ways, which are not mutually exclusive. A) Allergic rhinitis symptoms might make it

304 more difficult for flu-like viruses to find their way to the lung cells that are vulnerable to it, such as  
305 ACE-2 receptor positive cells in case of SARS-CoV-2 (Wan et al., 2020). B) The application of hay  
306 fever medication – the basis of the index - likely reduces over-reporting (false positives) of flu-like  
307 incidence because they suppress symptoms that are typically confused with flu. C) The anti-histamine  
308 hay fever medication possibly suppresses flu-like symptoms as well. In this respect interesting to note  
309 that COVID-19 patients typically suffer from an over-expression of the immune system.

310 The only meteorological variable that has a co-inhibitive effect on flu-like life cycles, solar radiation,  
311 has a stimulating effect on aerosol pollen formation, and is responsible for melatonin-induced  
312 immuno-activation. Relative humidity reduces pollen aerosol formation, and correlates positively with  
313 flu-like incidence. In our study we showed that temperature, except for influencing the onset of pollen  
314 season, has no predictive value for the flu-like lifecycle, and therefore its inverse correlation with flu-  
315 like epidemics is probably spurious: the common causal factor seems to be solar radiation.

316 We showed that a compound model, based on threshold values for pollen and solar radiation, results in  
317 a stronger association with the flu-like lifecycle than the individual inhibitors. This model could form  
318 an empirical basis for testing flu-like seasonality, reliably predicting the start and end of each flu-like  
319 cycle.

320 A plausible explanation of the beneficial effect of allergenic pollen consists of the well-established  
321 induction by pollen of flu-like symptoms or allergic rhinitis, that might block viral pathways via the  
322 respiratory system, including general anti-viral immune responses. Interesting in this respect is that in  
323 some studies “other allergic diseases” are absent as a co-morbid condition of COVID-19 (Zhang et al.,  
324 2020), although more confirmation is needed. As the prevalence of allergic rhinitis in Western Europe  
325 is around 23% and frequently undiagnosed (Bauchau & Durham, 2004), and the prevalence of allergic  
326 diseases in general in the Netherlands is around 52% (Van de Ven et al, 2006), the allergenic path  
327 provides a plausible explanation for an inhibitory effect of pollen on flu-like epidemics.

328 A second explanation of the beneficial effect of aerosol pollen might be their direct anti-viral  
329 properties, and an interaction that prevents viruses to effectively reach new potential hosts.

330 Meteorological variables such as increased solar radiation and temperature are not only triggering  
331 pollen ripening, but also affect the bio-aerosol formation: dry and warm conditions stimulate pollen to  
332 be airborne, and makes the bio-aerosol more hostile to flu-like viruses as it occasionally might reach  
333 sterilizing temperatures. Rain, to the opposite, makes pollen less airborne, cools the bio-aerosol down,  
334 and very high humidity levels (RH 98%) are even detrimental for pollen (Guarnieri, 2006). The RH  
335 98% effect on pollen, could thus provide an alternative explanation of why flu-like incidence in  
336 tropical countries is higher during rainy season, and reduced during the rest of the year.

337 A third explanation might be related to circadian and seasonal rhythms being coded into the  
338 functioning of our immune system, “switching off” to a lower gear during the night, and  
339 Autumn/Winter, and “switching on” during day light and Spring/Summer. Not only solar (UV)  
340 radiation and temperature, but also pollen, could function as a gene-coded trigger associated to the un-  
341 depression of the immune system, which would make evolutionary sense as pollen is *the* distinct  
342 harbinger of the seasons of opportunity.

343 The emergence at the tail-end of flu season of COVID-19 and other pandemics makes sense as well as  
344 it takes time for a spontaneous new cross-over virus with a sufficiently high reproduction number  $R_0$  –  
345 for SARS-CoV-2 it is estimated to be initially around 3 (Liu et al., 2020) - to develop from patient 0 to  
346 a full-fledged pandemic during flu season on the Northern Hemisphere. Chances for the Northern  
347 Hemisphere with its larger populations are higher to be the initial breeding ground for a new flu-like  
348 pandemic than the Southern Hemisphere.

349 It will require further research to test the findings, threshold values and predictive model for flu  
350 seasonality in other countries with different climates, pollution levels (Coccia, 2020), and effects of  
351 climate change (Frei & Gassner, 2008) and behavior (Gozzi et al, 2020). A consequence of our  
352 findings could potentially be that social distancing and other preventive behavior are especially  
353 important during flu-like season, but probably less relevant during pollen season when nature takes  
354 care by inhibiting viruses.



355 Further, it is good to understand better the interaction between aerosol pollen and flu-like viruses,  
356 including their anti-viral properties. Another question is whether immuno-activation by pollen is  
357 indeed a causal factor in reducing the spread of flu-like viruses and whether that depends on anti-viral  
358 immune responses or indiscriminate ones. Understanding this might lead to new therapeutic  
359 approaches.

360 On the basis of current data, we can conclude that also the covid-19 pandemic is seasonal and as a  
361 consequence multicycle, and will thus likely return from week 33 on, like all other flu-like viruses,  
362 when pollen season is over in the Northern Hemisphere. It is important to be prepared for it as long as  
363 there are no effective vaccines or therapies and as long as its herd immunity (Fine et al., 2011) is still  
364 below required thresholds for ending pandemics (Plans-Rubio, 2012).

365

366 **Acknowledgements:** thanks to Sowjanya Putrevu, data scientist at Icecat, for her voluntary support  
367 with executing statistical tests.

368

## 369 **Literature**

370 Abhimanyu O.P. & Coussens A.K. (2017). The role of UV radiation and vitamin D in the seasonality  
371 and outcomes of infectious disease. *Photochemical & Photobiological Studies*, issue 3.

372 Bauchau V. & Durham S.R. (2004). Prevalence and rate of diagnosis of allergic rhinitis in Europe.  
373 *European Respiratory Journal*, 24: 758-764; DOI: 10.1183/09031936.04.00013904

374 Brandelius A., Andersson M. & Uller L. (2020). Topical dsRNA challenges may induce  
375 overexpression of airway antiviral cytokines in symptomatic allergic disease. A pilot in vivo study in  
376 nasal airways. *Respiratory Medicine*, vol 108(12) 1816-1819  
377 <https://doi.org/10.1016/j.rmed.2014.10.010>

378 Chen X., Dai G.H., Ren Z.M., Tong Y.L., Yang F., & Zhu Y.Q. (2016). Identification of Dietetically  
379 Absorbed Rapeseed (*Brassica campestris* L.) Bee Pollen MicroRNAs in Serum of Mice. *Hindawi*

- 380 Publishing Corporation, BioMed Research International, Article ID 5413849.
- 381 <http://dx.doi.org/10.1155/2016/5413849>
- 382 Chong K.C., Liang J., Jia K.M., Kobayashi N., Wang M.W., Wei L., Lau S.Y.F., & Sumi A. Latitudes  
383 mediate the association between influenza activity and meteorological factors: A nationwide  
384 modelling analysis in 45 Japanese prefectures from 2000 to 2018. *Science of the Total Environment*.  
385 Vol 703, February 2020. <https://doi.org/10.1016/j.scitotenv.2019.134727>
- 386 Coccia M. (2020). Diffusion of COVID-19 outbreaks: the interaction between air pollution-to-human  
387 and human-to-human transmission dynamics in hinterland regions with cold weather and low average  
388 wind speed. Working Paper CocciaLab n. 48/2020, CNR - National Research Council of Italy.
- 389 Fine P., Eames K. & Heymann D.L., “Herd Immunity”: A Rough Guide, *Clinical Infectious Diseases*,  
390 Vol 52(7), April 2011, 911–916, <https://doi.org/10.1093/cid/cir007>.
- 391 Fox S.J., Miller J.C., & Meyers L.A. (2017). Seasonality in risk of pandemic influenza emergence.  
392 *PLoS Comput Biol*. Oct; 13(10): e1005749. doi: 10.1371/journal.pcbi.1005749
- 393 Ghanem K.Z., Ramadan M.M., Ghanem H.Z., Fadel M. Improving the production of unsaturated fatty  
394 acid esters and flavonoids from date palm pollen and their effects as anti-breast-cancer and antiviral  
395 agents: An in-vitro study. *J Arab Soc Med Res* 2015;10:47-55.
- 396 Gozzi N., Perrotta D., Paolotti D., and Perra N. (2020). Towards a data-driven characterization of  
397 behavioral changes induced by the seasonal flu. Cornell University. arXiv:2002.00671 [physics.soc-  
398 ph].
- 399 Guarnieri, M., Speranza, A., Nepi, M. et al. (2006). Ripe pollen carbohydrate changes in *Trachycarpus*  
400 *fortunei*: the effect of relative humidity. *Sex Plant Reprod* 19, 117. [https://doi.org/10.1007/s00497-](https://doi.org/10.1007/s00497-006-0027-3)  
401 [006-0027-3](https://doi.org/10.1007/s00497-006-0027-3)
- 402 Frei, T. & Gassner, E. Climate change and its impact on birch pollen quantities and the start of the  
403 pollen season an example from Switzerland for the period 1969–2006. *Int J Biometeorol* 52, 667  
404 (2008). <https://doi.org/10.1007/s00484-008-0159-2>

405 Hoogeveen M.J. Pollen likely seasonal factor in inhibiting flu-like epidemics. A Dutch study into the  
406 inverse relation between pollen counts, hay fever and flu-like incidence 2016–2019, *Science of The*  
407 *Total Environment*, Vol. 727, 2020, <https://doi.org/10.1016/j.scitotenv.2020.138543>.

408 Howarth, P.H. (2000). Allergic rhinitis: not purely a histamine-related disease. *European Journal of*  
409 *Allergy and Clinical Immunology*, Vol 55(s64), 7-16.

410 Klemens, C., Rasp, G., Jund, F., Hilgert, E., Devens, C., Pfrogner, E., Kramer, M.F. Mediators and  
411 cytokines in allergic and viral-triggered rhinitis. *Allergy & Asthma Proceedings* . Jul/Aug 2007, Vol  
412 28(4), 434-441.

413 Kissler S.M., Tedijanto C., Goldstein E., Grad Y.H. & Lipsitch M. (2020). Projecting the transmission  
414 dynamics of SARS-CoV-2 through the post-pandemic period. *Science* 10.1126/science.abb5793.

415 Liu Y., Gayle A.A., Wilder-Smith A., Rocklöv J. The reproductive number of COVID-19 is higher  
416 compared to SARS coronavirus, *Journal of Travel Medicine*, Vol 27(2), March 2020,  
417 <https://doi.org/10.1093/jtm/taaa021>.

418 Moriyama M., Hugentobler W.J. & Iwasaki A.. Seasonality of Respiratory Viral Infections. *Annual*  
419 *Review of Virology* 2020 7:1. <https://doi.org/10.1146/annurev-virology-012420-022445>.

420 Nosal C., Ehlers A. & Haspel J.A.. Why Lungs Keep Time: Circadian Rhythms and Lung Immunity.  
421 *Annual Review of Physiology* 2020 82:1, 391-412. [https://doi.org/10.1146/annurev-physiol-021119-](https://doi.org/10.1146/annurev-physiol-021119-034602)  
422 [034602](https://doi.org/10.1146/annurev-physiol-021119-034602).

423 Palmer-Young E.C., Tozkar C. Ö., Schwarz R.S., Chen Y.P., Irwin R.E., Adler L.S., Evans J.D.  
424 (2017). Nectar and Pollen Phytochemicals Stimulate Honey Bee (Hymenoptera: Apidae) Immunity to  
425 Viral Infection, *Journal of Economic Entomology*, Vol 110(5), October, 1959–1972,  
426 <https://doi.org/10.1093/jee/tox193>.

427 Plans-Rubió P.. The vaccination coverage required to establish herd immunity against influenza  
428 viruses. *Preventive Medicine*, Vol 55(1), July 2012, 72-77.  
429 <https://doi.org/10.1016/j.ypmed.2012.02.015>.

- 430 Postnikov, E. (2016). Dynamical prediction of flu seasonality driven by ambient temperature:  
431 influenza vs. common cold. *Eur. Phys. J. B* 89, 13. <https://doi.org/10.1140/epjb/e2015-50845-7>
- 432 Rosenwasser, L. J. (2011). Current Understanding of the Pathophysiology of Allergic Rhinitis.  
433 *Immunology and Allergy Clinics*, Vol 31(3), p 433 – 439.
- 434 Schuit M., Gardner S., Wood S., Bower K., Williams G., Freeburger D., Dabisch P. The Influence of  
435 Simulated Sunlight on the Inactivation of Influenza Virus in Aerosols, *The Journal of Infectious*  
436 *Diseases*, Vol 221(3), February 2020, p 372–378, <https://doi.org/10.1093/infdis/jiz582>.
- 437 Shaman J., Goldstein E. & Lipsitch M. (2011) Absolute Humidity and Pandemic Versus Epidemic  
438 Influenza, *American Journal of Epidemiology*, Vol 173(2), January 2011, p 127–135,  
439 <https://doi.org/10.1093/aje/kwq347>
- 440 Soebiyanto R.P., Clara W., Jara J., Castillo L., Sorto O.R., Marinero S., Barnett de Antinori M.E.,  
441 McCracken J.P., Widdowson M.A., Azziz-Baumgartner E., & Kiang R.K. (2014). The Role of  
442 Temperature and Humidity on Seasonal Influenza in Tropical Areas: Guatemala, El Salvador and  
443 Panama, 2008–2013. *PLoS One* 9(6): e100659. Published online 2014 Jun 23. doi:  
444 [10.1371/journal.pone.0100659](https://doi.org/10.1371/journal.pone.0100659)
- 445 Tamerius, J., Nelson, M. I., Zhou, S. Z., Viboud, C., Miller, M. A., & Alonso, W. J. (2011). Global  
446 influenza seasonality: reconciling patterns across temperate and tropical regions. *Environmental health*  
447 *perspectives*, 119(4), 439–445. <https://doi.org/10.1289/ehp.1002383>.
- 448 Tan D.X. & Ruegger Hardeland R. (2020). Potential utility of melatonin in deadly infectious diseases  
449 related to the overreaction of innate immune response and destructive inflammation: focus on COVID-  
450 19. Melatonin in deadly virus infection. *Melatonin Research* Vol 3(1). DOI:  
451 <https://doi.org/10.32794/mr11250052>
- 452 Van De Ven M.O.M., Van Den Eijnden R.J.J.M., Engels R.C.M.E. Atopic diseases and related risk  
453 factors among Dutch adolescents, *European Journal of Public Health*, Vol 16(5), October 2006, p  
454 549–558, <https://doi.org/10.1093/eurpub/ckl022>.

- 455 Wachsman M.B., Lopez E.M.F., Ramirez J.A., Galagovksy L.R., & Coto C.E. (2000). Antiviral effect  
456 of brassinosteroids against herpes virus and arenaviruses. *Antiviral Chemistry & Chemotherapy*  
457 11:71–77.
- 458 Wan, Y. et al. (2020). *J. Virol.* Receptor Recognition by the Novel Coronavirus from Wuhan: an  
459 Analysis Based on Decade-Long Structural Studies of SARS Coronavirus. [Epub ahead of print].  
460 <https://jvi.asm.org/content/94/7/e00127-20.long>
- 461 Yao Y., Pan J.H., Liu Z.X., Meng X., Wang W.D., Kan H.D. & Wang W.B. (2020). No Association of  
462 COVID-19 transmission with temperature or UV radiation in Chinese cities. *European Respiratory*  
463 *Journal* 2020; DOI: 10.1183/13993003.00517-2020
